# Supplementary material
Source: publisher figshare collection journal article supplement (https://gsajournals.figshare.com/ndownloader/files/24527432)
Supplement: Supplementary file 1 [file 24527432]

## Sheet: Sheet1
	TABLE S3. MROD ACTIVITIES OBTAINED FROM YEAST STRAINS EXPRESSING CYP1A2
	Strain 1.	MROD Activities2:
		NADPH NADP
	BY4743	2.4	<1
	rad2	7.41	0.2
	rad18	5.65	0.13
	rad55	5.31	0.18
	ogg1	7.61	0.3
	1.All strains listed below are isogenic for BY4743 containing pCS316 (YB556, see Table S1, for full genotype) with the exception of the kanMX disruption in the designated listed gene
	2.pmol/min/mg, N > 2; activities are listed for extracts supplemented with NAPDH and NADP
